# Supplementary material for: Mutation Accumulation in a Selfing Population: Consequences of Different Mutation Rates between Selfers and Outcrossers
Source: PubMed Central journal article supplement (PMC3308984; doi:10.1371/journal.pone.0033541), 2012-03-20
Supplement: pone.0033541.s003.pdf [file pone.0033541.s003.pdf]

**Table S1.** Mean number of mutated loci per individual at each stage in the  $n$ -th generation.

| Stage        | Outcrossing                    |                 | Selfing                         |                                        |
|--------------|--------------------------------|-----------------|---------------------------------|----------------------------------------|
|              | Heterozygous loci              | Homozygous loci | Heterozygous loci               | Homozygous loci                        |
| Mutation     | $v_n + 2U$                     | 0               | $v_n + 2U$                      | $w_n$                                  |
| Reproduction | $v_n + 2U$                     | 0               | $v_n/2 + U$                     | $w_n + v_n/4 + U/2$                    |
| Selection    | $(1 - hs)(v_n + 2U) = v_{n+1}$ | 0               | $(1 - hs)(v_n/2 + U) = v_{n+1}$ | $(1 - s)(w_n + v_n/4 + U/2) = w_{n+1}$ |

Initially before mutation, the mean numbers of loci that are heterozygous and homozygous for the deleterious allele are given by  $v_n$  and  $w_n$ , respectively.
